# Supplementary material for: Transcriptional Regulation of Metabolic and Cellular Processes in Durum Wheat (Triticum turgidum subsp. durum) in the Face of Temperature Increasing
Source: MDPI journal article supplement (doi:10.3390/plants10122792), 2021-12-16
Supplement: s1 [file s1]

## Supplementary material

### Transcriptional Regulation of Metabolic and Cellular Processes in Durum Wheat (*Triticum turgidum* subsp. *durum*) in the Face of Temperature Increasing

Luis Abraham Chaparro-Encinas, Gustavo Santoyo, Juan José Peña-Cabriaes, Luciano Castro-Espinoza, Fannie Isela Parra-Cota, and Sergio de los Santos-Villalobos

Table S1. Distribution of paired-end reads after trimming and mapping process for T\_optimal and T\_heat seedlings

| Samples       | Paired-ends raw reads | Trimmed Reads (*)      | Overall mapped reads (**) | Multimapped reads (**) | Uniquely mapped reads (**) |
|---------------|-----------------------|------------------------|---------------------------|------------------------|----------------------------|
| T_optimal (1) | 94,598,223            | 78,015,984<br>(82.47%) | 71,704,491<br>(91.91%)    | 9,581,229<br>(12.28%)  | 50,520,079<br>(64.76%)     |
| T_optimal (2) | 52,091,756            | 41,741,296<br>(80.13%) | 38,965,500<br>(93.35%)    | 6,915,879<br>(16.57%)  | 23,683,689<br>(56.74%)     |
| T_optimal (3) | 75,525,612            | 58,762,694<br>(77.80%) | 55,342,705<br>(94.18%)    | 8,123,507<br>(13.82%)  | 35,248,083<br>(59.98%)     |
| T_heat (1)    | 85,038,673            | 63,715,241<br>(74.93%) | 58,802,796<br>(92.29%)    | 2,757,984<br>(4.33%)   | 51,781,928<br>(81.27%)     |
| T_heat (2)    | 93,930,810            | 74,102,477<br>(78.89%) | 70,115,764<br>(94.62%)    | 11,254,431<br>(15.19%) | 44,236,107<br>(59.70%)     |
| T_heat (3)    | 83,391,251            | 63,682,257<br>(76.37%) | 59,721,221<br>(93.78%)    | 13,345,674<br>(20.96%) | 34,979,976<br>(54.93%)     |

\* The percentage value was calculated for paired-end raw reads. \*\* The percentage value was calculated

Table S2. List of DEGs filtered by adjusted FDR  $\leq 0.05$ , and  $|\log_2 \text{ fold change}| \geq 1.3$

| Gene ID        | $\log_2 \text{ fold change}$ | FDR      |
|----------------|------------------------------|----------|
| TRIDC5AG047410 | -4.352                       | 9.23E-29 |
| TRIDC4AG063850 | 3.597                        | 7.10E-19 |
| TRIDC6AG005710 | -18.658                      | 1.46E-13 |
| TRIDC2AG065830 | -3.701                       | 1.46E-13 |
| TRIDC3AG019850 | -1.341                       | 1.46E-13 |
| TRIDC4BG032750 | -2.765                       | 1.17E-11 |
| TRIDC4AG063860 | 2.751                        | 2.08E-11 |
| TRIDC6AG058030 | -1.407                       | 1.42E-10 |
| TRIDC5BG009760 | -2.882                       | 5.93E-10 |
| TRIDC6BG054630 | 1.789                        | 7.12E-10 |
| TRIDC5AG046840 | -1.436                       | 1.14E-08 |
| TRIDC2AG043690 | -1.477                       | 1.36E-08 |
| TRIDC2BG032150 | -1.305                       | 6.49E-08 |
| TRIDC6BG017260 | 1.757                        | 1.22E-07 |
| TRIDC6BG043940 | -1.715                       | 8.36E-07 |
| TRIDC6BG067850 | -1.332                       | 1.62E-06 |
| TRIDC5BG018270 | 2.243                        | 1.62E-06 |
| TRIDC4AG063880 | 3.652                        | 1.62E-06 |
| TRIDC7AG075020 | 2.081                        | 1.86E-06 |
| TRIDC5BG070090 | -1.420                       | 2.11E-06 |
| TRIDC7AG022250 | -2.746                       | 3.63E-06 |
| TRIDC2BG046370 | -1.414                       | 3.63E-06 |
| TRIDC6AG041660 | -1.679                       | 3.69E-06 |
| TRIDC6AG011890 | 2.103                        | 6.03E-06 |
| TRIDC6AG010840 | -1.644                       | 1.09E-05 |
| TRIDC3BG052560 | -5.628                       | 1.32E-05 |
| TRIDC7AG033730 | 1.917                        | 1.59E-05 |
| TRIDC2BG090650 | -5.580                       | 1.87E-05 |
| TRIDC4BG042950 | -7.556                       | 4.29E-05 |
| TRIDC4BG008630 | -2.179                       | 8.64E-05 |
| TRIDC7AG006240 | 1.541                        | 1.33E-04 |
| TRIDC7BG061660 | -2.432                       | 1.38E-04 |
| TRIDC2AG001630 | 1.397                        | 1.55E-04 |
| TRIDC5AG020540 | -3.690                       | 1.74E-04 |
| TRIDC3BG025030 | -1.346                       | 2.10E-04 |
| TRIDC3BG043350 | -7.475                       | 2.39E-04 |
| TRIDC7BG056330 | 1.507                        | 2.77E-04 |
| TRIDC5BG051120 | -2.157                       | 3.06E-04 |

|                |         |          |
|----------------|---------|----------|
| TRIDC6BG072880 | -7.903  | 3.23E-04 |
| TRIDC7AG021890 | -6.328  | 3.29E-04 |
| TRIDC7BG074740 | -7.826  | 3.45E-04 |
| TRIDC2BG042360 | -20.670 | 4.24E-04 |
| TRIDC2BG006380 | 1.399   | 4.76E-04 |
| TRIDC2BG038880 | 2.809   | 5.18E-04 |
| TRIDC5BG053460 | 1.376   | 5.23E-04 |
| TRIDC7BG045270 | -3.522  | 5.66E-04 |
| TRIDC2AG077130 | -2.826  | 5.77E-04 |
| TRIDC5BG010470 | -7.548  | 6.11E-04 |
| TRIDC7AG013410 | -7.519  | 6.72E-04 |
| TRIDC2BG059360 | -20.112 | 7.17E-04 |
| TRIDC3AG017450 | -3.988  | 7.65E-04 |
| TRIDC2BG080020 | -7.458  | 7.91E-04 |
| TRIDC7BG021730 | 1.312   | 9.17E-04 |
| TRIDC4AG012300 | 1.339   | 9.24E-04 |
| TRIDC5AG043950 | -6.355  | 9.47E-04 |
| TRIDC2AG041570 | -1.491  | 1.10E-03 |
| TRIDC6BG025800 | -4.045  | 1.30E-03 |
| TRIDC6AG021140 | -4.271  | 1.39E-03 |
| TRIDC3BG045570 | -1.689  | 1.39E-03 |
| TRIDC7AG062880 | -3.786  | 1.58E-03 |
| TRIDC2BG068510 | -8.010  | 1.67E-03 |
| TRIDC1BG040170 | -1.321  | 1.81E-03 |
| TRIDC2BG051270 | -4.468  | 2.02E-03 |
| TRIDC6BG007940 | -6.172  | 2.26E-03 |
| TRIDC3AG012180 | -7.534  | 2.32E-03 |
| TRIDC2BG015880 | -2.039  | 2.34E-03 |
| TRIDC5AG029700 | -1.410  | 2.35E-03 |
| TRIDC4BG037100 | 1.992   | 2.38E-03 |
| TRIDC7AG031090 | -3.451  | 2.61E-03 |
| TRIDC4AG023830 | -1.727  | 2.61E-03 |
| TRIDC1BG004790 | -1.720  | 2.72E-03 |
| TRIDC2AG066940 | 1.322   | 2.72E-03 |
| TRIDC2BG025970 | -7.080  | 2.85E-03 |
| TRIDC2AG023840 | 1.870   | 2.85E-03 |
| TRIDC3AG040710 | -3.977  | 2.87E-03 |
| TRIDC2BG034440 | -7.837  | 2.88E-03 |
| TRIDC2AG055510 | -4.746  | 2.88E-03 |
| TRIDC1BG031820 | -1.671  | 2.97E-03 |
| TRIDC5AG021050 | -1.463  | 2.98E-03 |

|                |        |          |
|----------------|--------|----------|
| TRIDC1AG037370 | -1.443 | 3.06E-03 |
| TRIDC5BG011000 | -6.045 | 3.17E-03 |
| TRIDC6AG011900 | 1.475  | 3.20E-03 |
| TRIDC3AG055380 | -1.477 | 3.66E-03 |
| TRIDC2AG033960 | 1.927  | 3.66E-03 |
| TRIDC5BG036930 | -1.918 | 3.68E-03 |
| TRIDC3AG009740 | -3.452 | 3.86E-03 |
| TRIDC2BG082330 | -1.877 | 3.86E-03 |
| TRIDC3BG039950 | 1.562  | 3.91E-03 |
| TRIDC5BG058740 | 1.580  | 3.96E-03 |
| TRIDC7AG052900 | -1.825 | 4.22E-03 |
| TRIDC2BG061970 | 1.392  | 4.44E-03 |
| TRIDC6BG048590 | -2.270 | 4.63E-03 |
| TRIDC6AG021100 | -6.762 | 4.99E-03 |
| TRIDC5BG000800 | -6.904 | 5.23E-03 |
| TRIDC6AG039210 | -1.399 | 5.45E-03 |
| TRIDC7AG021480 | -1.375 | 5.61E-03 |
| TRIDC1BG040780 | 2.076  | 5.61E-03 |
| TRIDC3AG046290 | -7.197 | 5.92E-03 |
| TRIDC4BG052890 | -5.821 | 6.03E-03 |
| TRIDC2BG082650 | -6.762 | 6.09E-03 |
| TRIDC5AG035000 | -4.364 | 6.19E-03 |
| TRIDC2BG056060 | -2.049 | 6.30E-03 |
| TRIDC4BG055730 | -2.877 | 6.60E-03 |
| TRIDC1BG051340 | -5.755 | 6.60E-03 |
| TRIDC1AG061460 | -7.408 | 6.70E-03 |
| TRIDC5BG009120 | -2.097 | 7.33E-03 |
| TRIDC4AG016130 | -1.422 | 7.33E-03 |
| TRIDC2BG039440 | -1.418 | 7.33E-03 |
| TRIDC5BG013060 | 1.397  | 7.46E-03 |
| TRIDC2AG080440 | -7.432 | 7.56E-03 |
| TRIDC3AG006590 | -1.513 | 7.57E-03 |
| TRIDC7AG025280 | -2.536 | 8.17E-03 |
| TRIDC2AG008470 | -3.316 | 8.33E-03 |
| TRIDC4AG038540 | -2.006 | 8.33E-03 |
| TRIDC2BG029870 | -6.126 | 8.56E-03 |
| TRIDC5AG068850 | 2.528  | 8.77E-03 |
| TRIDC5AG005640 | -1.618 | 8.91E-03 |
| TRIDC5BG026880 | -7.003 | 9.10E-03 |
| TRIDC2AG013320 | -1.350 | 9.61E-03 |
| TRIDC1AG061690 | 1.652  | 9.61E-03 |

|                |        |          |
|----------------|--------|----------|
| TRIDC5BG037960 | -5.573 | 9.84E-03 |
| TRIDC3BG060650 | -2.259 | 1.00E-02 |
| TRIDC7BG053890 | -2.212 | 1.00E-02 |
| TRIDC5AG037990 | -6.349 | 1.01E-02 |
| TRIDC4AG019030 | -2.001 | 1.03E-02 |
| TRIDC7BG019460 | 3.188  | 1.03E-02 |
| TRIDC3BG024680 | 1.481  | 1.05E-02 |
| TRIDC7AG020140 | 1.908  | 1.06E-02 |
| TRIDC3AG040110 | -3.682 | 1.08E-02 |
| TRIDC3BG013490 | -2.935 | 1.10E-02 |
| TRIDC7BG046050 | -1.599 | 1.10E-02 |
| TRIDC4AG008190 | -2.884 | 1.12E-02 |
| TRIDC7BG010170 | 3.475  | 1.12E-02 |
| TRIDC5BG006190 | 1.397  | 1.21E-02 |
| TRIDC7AG037590 | -2.658 | 1.21E-02 |
| TRIDC6BG021850 | -2.265 | 1.21E-02 |
| TRIDC4BG056890 | -1.754 | 1.21E-02 |
| TRIDC1BG049170 | -1.870 | 1.22E-02 |
| TRIDC6BG071510 | -2.968 | 1.24E-02 |
| TRIDC7AG072970 | 2.033  | 1.29E-02 |
| TRIDC6BG073190 | -4.942 | 1.33E-02 |
| TRIDC3BG006400 | 1.843  | 1.44E-02 |
| TRIDC7AG005860 | -1.729 | 1.45E-02 |
| TRIDC6BG012300 | -6.570 | 1.47E-02 |
| TRIDC1BG025800 | -1.522 | 1.51E-02 |
| TRIDC6AG042450 | -6.454 | 1.51E-02 |
| TRIDC5BG010520 | -2.159 | 1.53E-02 |
| TRIDC6AG000240 | -1.610 | 1.53E-02 |
| TRIDC5AG014710 | -1.541 | 1.53E-02 |
| TRIDC2BG006310 | 1.495  | 1.53E-02 |
| TRIDC2BG087400 | -1.575 | 1.54E-02 |
| TRIDC1AG040150 | -1.668 | 1.54E-02 |
| TRIDC5BG049870 | -7.606 | 1.56E-02 |
| TRIDC2BG010910 | 3.653  | 1.59E-02 |
| TRIDC2BG032830 | -1.539 | 1.59E-02 |
| TRIDC3AG022790 | -1.785 | 1.59E-02 |
| TRIDC6AG034550 | -2.796 | 1.62E-02 |
| TRIDC4BG000550 | -1.480 | 1.67E-02 |
| TRIDC5BG078550 | -7.149 | 1.69E-02 |
| TRIDC6BG046780 | -4.521 | 1.72E-02 |
| TRIDC6BG052920 | -3.946 | 1.72E-02 |

|                |        |          |
|----------------|--------|----------|
| TRIDC7AG019910 | -1.833 | 1.80E-02 |
| TRIDC1BG007600 | -1.529 | 1.81E-02 |
| TRIDC3AG017410 | -1.384 | 1.81E-02 |
| TRIDC6AG014100 | -6.982 | 1.81E-02 |
| TRIDC4BG010840 | -1.827 | 1.84E-02 |
| TRIDC3AG050160 | -6.142 | 1.92E-02 |
| TRIDC7AG045430 | -4.859 | 1.92E-02 |
| TRIDC7AG075040 | 1.482  | 1.94E-02 |
| TRIDC7BG032770 | -1.738 | 1.95E-02 |
| TRIDC3BG001230 | -7.048 | 2.02E-02 |
| TRIDC5AG072330 | -1.556 | 2.05E-02 |
| TRIDC4BG000670 | 1.307  | 2.06E-02 |
| TRIDC1BG034560 | -6.794 | 2.08E-02 |
| TRIDC5AG065090 | -3.356 | 2.08E-02 |
| TRIDC5AG007500 | -2.854 | 2.08E-02 |
| TRIDC6BG026600 | -6.773 | 2.10E-02 |
| TRIDC3BG037750 | 1.479  | 2.12E-02 |
| TRIDC2AG066680 | 4.473  | 2.14E-02 |
| TRIDC3AG072040 | -1.664 | 2.14E-02 |
| TRIDC1BG032670 | -1.338 | 2.14E-02 |
| TRIDC2AG077740 | -6.280 | 2.15E-02 |
| TRIDC2BG085700 | -2.704 | 2.19E-02 |
| TRIDC7AG060170 | -7.578 | 2.23E-02 |
| TRIDC1AG043930 | -3.888 | 2.29E-02 |
| TRIDC2AG080650 | -3.516 | 2.29E-02 |
| TRIDC4AG016330 | -5.127 | 2.32E-02 |
| TRIDC5AG007720 | -1.704 | 2.32E-02 |
| TRIDC6AG054990 | 2.009  | 2.33E-02 |
| TRIDC2BG048610 | -7.604 | 2.33E-02 |
| TRIDC5BG001040 | -6.467 | 2.34E-02 |
| TRIDC2BG089510 | -2.784 | 2.35E-02 |
| TRIDC2AG019170 | -6.187 | 2.36E-02 |
| TRIDC7AG016880 | -6.708 | 2.37E-02 |
| TRIDC7BG060470 | 1.322  | 2.46E-02 |
| TRIDC3BG039900 | -6.957 | 2.50E-02 |
| TRIDC1AG004560 | -3.028 | 2.51E-02 |
| TRIDC5AG037820 | -6.885 | 2.52E-02 |
| TRIDC1BG066730 | 1.339  | 2.53E-02 |
| TRIDC7AG020710 | 1.357  | 2.53E-02 |
| TRIDC1BG056420 | 1.908  | 2.53E-02 |
| TRIDC2BG011890 | -4.384 | 2.57E-02 |

|                |        |          |
|----------------|--------|----------|
| TRIDC5BG072370 | -4.375 | 2.57E-02 |
| TRIDC7BG003240 | -7.382 | 2.61E-02 |
| TRIDC3AG037860 | -6.566 | 2.62E-02 |
| TRIDC2AG049210 | -1.603 | 2.63E-02 |
| TRIDC7AG075460 | 1.511  | 2.63E-02 |
| TRIDC4AG030140 | -2.055 | 2.64E-02 |
| TRIDC1AG041860 | -1.316 | 2.73E-02 |
| TRIDC5BG008940 | -3.858 | 2.75E-02 |
| TRIDC7BG058370 | -1.733 | 2.94E-02 |
| TRIDC6AG056910 | -1.522 | 3.00E-02 |
| TRIDC7BG036190 | 2.050  | 3.00E-02 |
| TRIDC2AG023120 | 3.222  | 3.08E-02 |
| TRIDC7AG012250 | -1.936 | 3.13E-02 |
| TRIDC1BG016990 | -6.152 | 3.15E-02 |
| TRIDC6BG011930 | -4.093 | 3.25E-02 |
| TRIDC2AG078730 | 1.360  | 3.25E-02 |
| TRIDC4BG005240 | 1.921  | 3.25E-02 |
| TRIDC5BG082230 | -1.705 | 3.30E-02 |
| TRIDC4AG063010 | -4.897 | 3.30E-02 |
| TRIDC2AG078690 | 1.862  | 3.30E-02 |
| TRIDC3AG030320 | -6.673 | 3.32E-02 |
| TRIDC5AG001540 | 1.328  | 3.35E-02 |
| TRIDC5AG030910 | -7.344 | 3.36E-02 |
| TRIDC5BG007180 | -4.532 | 3.41E-02 |
| TRIDC4BG008640 | -1.470 | 3.41E-02 |
| TRIDC4AG071950 | -6.659 | 3.41E-02 |
| TRIDC6BG023580 | -1.977 | 3.43E-02 |
| TRIDC2BG051790 | -3.467 | 3.43E-02 |
| TRIDC5BG031060 | -1.886 | 3.43E-02 |
| TRIDC7AG059380 | 2.280  | 3.44E-02 |
| TRIDC1AG023310 | -6.723 | 3.50E-02 |
| TRIDC2BG014330 | -6.725 | 3.51E-02 |
| TRIDC2BG032750 | -1.513 | 3.53E-02 |
| TRIDC2BG017450 | -3.289 | 3.54E-02 |
| TRIDC6BG012240 | 2.280  | 3.54E-02 |
| TRIDC5AG043470 | -3.267 | 3.57E-02 |
| TRIDC1AG039360 | 1.776  | 3.58E-02 |
| TRIDC2AG080710 | -2.463 | 3.61E-02 |
| TRIDC7BG068600 | 1.402  | 3.64E-02 |
| TRIDC7BG002180 | -4.966 | 3.67E-02 |
| TRIDC7BG026890 | 1.503  | 3.67E-02 |

|                |        |          |
|----------------|--------|----------|
| TRIDC1BG021020 | 1.351  | 3.68E-02 |
| TRIDC7BG036280 | -3.536 | 3.71E-02 |
| TRIDC4AG011220 | -2.954 | 3.71E-02 |
| TRIDC5AG040580 | 7.976  | 3.78E-02 |
| TRIDC2BG000740 | 1.798  | 3.82E-02 |
| TRIDC6AG003780 | -3.582 | 3.88E-02 |
| TRIDC5AG003240 | 2.015  | 3.88E-02 |
| TRIDC6AG000750 | 1.329  | 4.09E-02 |
| TRIDC7BG032720 | 1.347  | 4.10E-02 |
| TRIDC5BG079600 | -6.364 | 4.12E-02 |
| TRIDC1BG002730 | -1.921 | 4.20E-02 |
| TRIDC6BG021650 | 1.426  | 4.22E-02 |
| TRIDC4BG000470 | 1.304  | 4.24E-02 |
| TRIDC1BG044360 | 2.432  | 4.24E-02 |
| TRIDC2BG004420 | 2.060  | 4.27E-02 |
| TRIDC2BG031640 | 1.489  | 4.34E-02 |
| TRIDC3AG004470 | -1.343 | 4.34E-02 |
| TRIDC3BG004760 | 7.708  | 4.35E-02 |
| TRIDC2AG057350 | -2.410 | 4.35E-02 |
| TRIDC5AG054280 | -2.661 | 4.44E-02 |
| TRIDC1AG037530 | 1.782  | 4.45E-02 |
| TRIDC1BG043540 | -1.722 | 4.48E-02 |
| TRIDC4AG065770 | 5.008  | 4.48E-02 |
| TRIDC5AG006390 | -6.953 | 4.48E-02 |
| TRIDC1BG042910 | -5.678 | 4.51E-02 |
| TRIDC5BG010450 | -6.407 | 4.55E-02 |
| TRIDC2BG043990 | -7.127 | 4.58E-02 |
| TRIDC7BG045810 | 2.565  | 4.59E-02 |
| TRIDC4BG040200 | 1.300  | 4.61E-02 |
| TRIDC7BG064160 | 1.581  | 4.61E-02 |
| TRIDC2BG010230 | -5.467 | 4.61E-02 |
| TRIDC4BG060190 | -2.584 | 4.61E-02 |
| TRIDC5BG026280 | -3.572 | 4.61E-02 |
| TRIDC1AG047410 | -7.092 | 4.68E-02 |
| TRIDC7BG019110 | -3.286 | 4.77E-02 |
| TRIDC6BG038180 | -1.652 | 4.78E-02 |
| TRIDC4BG060480 | 2.281  | 4.78E-02 |
| TRIDC2AG036110 | -1.406 | 4.78E-02 |
| TRIDC2BG014720 | -1.480 | 4.81E-02 |
| TRIDC1AG026860 | 1.313  | 4.88E-02 |



Table S3 Functional classification of DEGs [ $FDR \leq 0.05$  and  $|\log_2 \text{ fold change}| \geq 1.3$ ] by Mercator/Mapman4

| Gene ID        | BIN         | Name                                                                                                                                                                  | Description                                                                                               | log2 Fold change |
|----------------|-------------|-----------------------------------------------------------------------------------------------------------------------------------------------------------------------|-----------------------------------------------------------------------------------------------------------|------------------|
| TRIDC5BG070090 | 1.1.1.1.1   | Photosynthesis/photophosphorylation/photosystem II/LHC-II complex/component LHCb1/2/3                                                                                 | component LHCb1/2/3 of LHC-II complex (original description: none)                                        | 1.420            |
| TRIDC3BG045570 | 1.1.9.3.1   | Photosynthesis/photophosphorylation/ATP synthase complex/assembly/assembly factor (CGL160)                                                                            | CGL160 factor involved in ATP synthase complex assembly (original description: none)                      | 1.689            |
| TRIDC7AG021480 | 1.2.1.2.4   | Photosynthesis/calvin cycle/ribulose-1,5-bisphosphat carboxylase/oxygenase (RuBisCo) activity/RuBisCo assembly/assembly factor (RbcX)                                 | Kinesin-like protein KIN-7D, chloroplastic OS=Oryza sativa subsp. japonica (sp q6yz52 kn7d_orysj : 268.0) | 1.375            |
| TRIDC4BG037100 | 4.1.5.3.5.1 | Amino acid metabolism/biosynthesis/shikimate family/tryptophan/tryptophan synthase heterodimer/subunit alpha                                                          | subunit alpha of tryptophan synthase complex (original description: none)                                 | -1.992           |
| TRIDC1AG004560 | 5.1.6.1.1   | Lipid metabolism/fatty acid biosynthesis/endoplasmic reticulum-localized fatty acid elongase (FAE) system/fatty acid elongation complex/3-ketoacyl-CoA synthase (KCS) | 3-ketoacyl-CoA synthase (KCS) (original description: none)                                                | 3.028            |
| TRIDC5BG049870 | 5.1.6.1.1   | Lipid metabolism/fatty acid biosynthesis/endoplasmic reticulum-localized fatty acid elongase (FAE) system/fatty acid elongation complex/3-ketoacyl-CoA synthase (KCS) | 3-ketoacyl-CoA synthase (KCS) (original description: none)                                                | 7.606            |

|                    |              |                                                                                                                                               |                                                                                                                |        |
|--------------------|--------------|-----------------------------------------------------------------------------------------------------------------------------------------------|----------------------------------------------------------------------------------------------------------------|--------|
| TRIDC5AG0<br>21050 | 5.1.7.1      | Lipid metabolism/fatty acid biosynthesis/fatty acid desaturation/stearoyl-ACP desaturase                                                      | stearoyl-ACP desaturase (original description: none)                                                           | 1.463  |
| TRIDC2BG0<br>32830 | 5.7.3.6.3    | Lipid metabolism/lipid degradation/fatty acid degradation/glyoxylate cycle/isocitrate lyase                                                   | isocitrate lyase (original description: none)                                                                  | 1.539  |
| TRIDC2BG0<br>56060 | 5.9.3        | Lipid metabolism/lipid bodies-associated activities/caleosin lipid body surface protein (CLO/PXG)                                             | caleosin (original description: none)                                                                          | 2.049  |
| TRIDC6AG0<br>00750 | 7.12.6.7.6   | Coenzyme metabolism/tetrapyrrol biosynthesis/chlorophyll metabolism/chlorophyll breakdown/red chlorophyll catabolite reductase (RCCR)         | red chlorophyll catabolite reductase (RCCR) (original description: none)                                       | -1.329 |
| TRIDC7AG0<br>52900 | 8.5.2.1      | Polyamine metabolism/polyamine degradation/FAD-dependent polyamine oxidase activities/cytosolic polyamine oxidase (PAO1)                      | cytosolic polyamine oxidase (PAO1)                                                                             | 1.825  |
| TRIDC2BG0<br>32150 | 9.1.1.7      | Secondary metabolism/terpenoids/mevalonate pathway/isopentenyl diphosphate isomerase                                                          | isopentenyl diphosphate isomerase (original description: none)                                                 | 1.305  |
| TRIDC2BG0<br>90650 | 9.3.1.1      | Secondary metabolism/alkaloids/indole alkaloid biosynthesis/aromatic L-amino acid decarboxylase                                               | aromatic L-amino acid decarboxylase (original description: none)                                               | 5.580  |
| TRIDC3AG0<br>50160 | 11.1.2.1.1.1 | Phytohormone action/abscisic acid/perception and signalling/PYR/PYL-receptor/cytoplasm-localized receptor complex/receptor component PYL/RCAR | receptor component PYL/RCAR of cytoplasm-localized abscisic acid receptor complex (original description: none) | 6.142  |

|                    |                  |                                                                                                                                                                                                        |                                                                                                                                                                                                                           |        |
|--------------------|------------------|--------------------------------------------------------------------------------------------------------------------------------------------------------------------------------------------------------|---------------------------------------------------------------------------------------------------------------------------------------------------------------------------------------------------------------------------|--------|
| TRIDC1BG0<br>66730 | 11.10.1.4.1      | Phytohormone<br>action/signalling<br>peptides/NCRP (non-<br>cysteine-rich-peptide)<br>category/CIF-peptide<br>activity/CIF-precursor<br>polypeptide                                                    | CIF precursor polypeptide<br>(original description: none)                                                                                                                                                                 | -1.339 |
| TRIDC6BG0<br>71510 | 11.4.2.5         | Phytohormone<br>action/cytokinin/perception<br>and signal transduction/A-<br>type ARR response negative<br>regulator                                                                                   | A-type ARR response negative<br>regulator                                                                                                                                                                                 | 2.968  |
| TRIDC7BG0<br>53890 | 12.1.2           | Chromatin<br>organization/histones/histone<br>(H2A)                                                                                                                                                    | Glucan endo-1,3-beta-<br>glucosidase 13 OS=Arabidopsis<br>thaliana (sp q9fju9 e1313_arath :<br>298.0) & Enzyme<br>classification.EC_3<br>hydrolases.EC_3.2<br>glycosylase(50.3.2 : 296.7)<br>(original description: none) | 2.212  |
| TRIDC5AG0<br>37990 | 13.1.1.3.1       | Cell cycle organization/cell<br>cycle control/cyclin-<br>dependent regulation/cyclin-<br>dependent protein kinase<br>inhibitor activities/inhibitor<br>(KRP/ICK)                                       | KRP/ICK-type cyclin-dependent<br>kinase inhibitor (original<br>description: none)                                                                                                                                         | 6.349  |
| TRIDC3BG0<br>37750 | 13.3.3.2.1       | Cell cycle<br>organization/mitosis and<br>meiosis/chromosome<br>segregation/kinetochore<br>proteins/kinetochore<br>assembly protein (CENP-C)                                                           | kinetochore assembly protein<br>(CENP-C) (original description:<br>none)                                                                                                                                                  | -1.479 |
| TRIDC2AG0<br>49210 | 13.3.6.5.1.<br>7 | Cell cycle<br>organization/mitosis and<br>meiosis/meiotic<br>recombination/meiotic<br>crossover/class I interference-<br>sensitive crossover<br>pathway/pachytene<br>checkpoint protein<br>(PCH2/CRC1) | meiotic crossover pachytene<br>checkpoint protein<br>(PCH2/CRC1) (original<br>description: none)                                                                                                                          | 1.603  |

|                    |            |                                                                                                                                    |                                                                                                            |        |
|--------------------|------------|------------------------------------------------------------------------------------------------------------------------------------|------------------------------------------------------------------------------------------------------------|--------|
| TRIDC5BG0<br>58740 | 15.3.3.1.6 | RNA biosynthesis/RNA polymerase II-dependent transcription/MEDIATOR transcription co-activator complex/head module/component MED19 | component MED19 of head module of MEDIATOR transcription co-activator complex (original description: none) | -1.580 |
| TRIDC3AG0<br>17410 | 15.5.1.1   | RNA biosynthesis/transcriptional regulation/C2C2 transcription factor superfamily/transcription factor (BBX-DBB)                   | transcription factor (BBX-DBB) (original description: none)                                                | 1.384  |
| TRIDC7BG0<br>36190 | 15.5.14    | RNA biosynthesis/transcriptional regulation/transcription factor (MADS/AGL)                                                        | protein kinase (RIO) (original description: none)                                                          | -2.050 |
| TRIDC6BG0<br>46780 | 15.5.14    | RNA biosynthesis/transcriptional regulation/transcription factor (MADS/AGL)                                                        | Cytochrome b5 isoform E OS=Arabidopsis thaliana (sp q42342 cyb5e_arath : 88.6)                             | 4.521  |
| TRIDC7BG0<br>03240 | 15.5.14    | RNA biosynthesis/transcriptional regulation/transcription factor (MADS/AGL)                                                        | ABC transporter C family member 10 OS=Arabidopsis thaliana (sp q9lys2 ab10c_arath : 195.0)                 | 7.382  |
| TRIDC4BG0<br>42950 | 15.5.14    | RNA biosynthesis/transcriptional regulation/transcription factor (MADS/AGL)                                                        | transcription factor (MADS/AGL) (original description: none)                                               | 7.556  |
| TRIDC2AG0<br>23120 | 15.5.15    | RNA biosynthesis/transcriptional regulation/transcription factor (C2H2-ZF)                                                         | C2H2 zinc finger transcription factor (original description: none)                                         | -3.222 |
| TRIDC5AG0<br>35000 | 15.5.15    | RNA biosynthesis/transcriptional regulation/transcription factor (C2H2-ZF)                                                         | C2H2 zinc finger transcription factor (original description: none)                                         | 4.364  |
| TRIDC5BG0<br>82230 | 15.5.2.1   | RNA biosynthesis/transcriptional regulation/MYB transcription factor superfamily/transcription factor (MYB)                        | transcription factor (MYB) (original description: none)                                                    | 1.705  |

|                    |             |                                                                                                                                                 |                                                                                        |        |
|--------------------|-------------|-------------------------------------------------------------------------------------------------------------------------------------------------|----------------------------------------------------------------------------------------|--------|
| TRIDC4AG0<br>11220 | 15.5.2.2    | RNA<br>biosynthesis/transcriptional<br>regulation/MYB<br>transcription factor<br>superfamily/transcription<br>factor (MYB-related)              | transcription factor (MYB-<br>related) (original description:<br>none)                 | 2.954  |
| TRIDC5BG0<br>37960 | 15.5.22     | RNA<br>biosynthesis/transcriptional<br>regulation/transcription factor<br>(WRKY)                                                                | transcription factor (WRKY)<br>(original description: none)                            | 5.573  |
| TRIDC5AG0<br>07720 | 15.5.32     | RNA<br>biosynthesis/transcriptional<br>regulation/transcription factor<br>(bHLH)                                                                | transcription factor (bHLH)<br>(original description: none)                            | 1.704  |
| TRIDC5BG0<br>31060 | 15.5.7.1    | RNA<br>biosynthesis/transcriptional<br>regulation/AP2/ERF<br>transcription factor<br>superfamily/transcription<br>factor (ERF)                  | transcription factor (ERF)<br>(original description: none)                             | 1.886  |
| TRIDC3AG0<br>46290 | 17.4.1.3.12 | Protein<br>biosynthesis/translation<br>initiation/Pre-Initiation<br>Complex (PIC) module/eIF3<br>mRNA-to-PIC binding<br>complex/component eIF31 | component eIF31 of eIF3<br>mRNA-to-PIC binding complex<br>(original description: none) | 7.197  |
| TRIDC6AG0<br>05710 | 18.10.1.4   | Protein<br>modification/targeting<br>peptide<br>maturation/endomembrane<br>system/signal peptidase<br>(SPP)                                     | nitrate transporter (NRT2)<br>(original description: none)                             | 18.658 |
| TRIDC6AG0<br>34550 | 18.4.1.12   | Protein<br>modification/phosphorylation<br>/TKL protein kinase<br>superfamily/protein kinase<br>(LRR-XII)                                       | protein kinase (LRR-XII)<br>(original description: none)                               | 2.796  |
| TRIDC1AG0<br>47410 | 18.4.1.12   | Protein<br>modification/phosphorylation<br>/TKL protein kinase<br>superfamily/protein kinase<br>(LRR-XII)                                       | protein kinase (LRR-XII)<br>(original description: none)                               | 7.092  |

|                    |             |                                                                                                                                                                          |                                                                                                                                                                                                                                                                                                             |       |
|--------------------|-------------|--------------------------------------------------------------------------------------------------------------------------------------------------------------------------|-------------------------------------------------------------------------------------------------------------------------------------------------------------------------------------------------------------------------------------------------------------------------------------------------------------|-------|
| TRIDC6BG0<br>23580 | 18.4.1.19   | Protein<br>modification/phosphorylation<br>/TKL protein kinase<br>superfamily/protein kinase<br>(L-lectin)                                                               | Probable LRR receptor-like<br>serine/threonine-protein kinase<br>At4g20450 OS=Arabidopsis<br>thaliana (sp c0lgq7 y4245_arath :<br>346.0) & Enzyme<br>classification.EC_2<br>transferases.EC_2.7 transferase<br>transferring phosphorus-<br>containing group(50.2.7 : 144.3)<br>(original description: none) | 1.977 |
| TRIDC7AG0<br>12250 | 18.4.1.24.1 | Protein<br>modification/phosphorylation<br>/TKL protein kinase<br>superfamily/G-Lectin protein<br>kinase families/protein kinase<br>(SD-1)                               | Acid phosphatase 1<br>OS=Solanum lycopersicum<br>(sp p27061 ppa1_sollc : 94.0)                                                                                                                                                                                                                              | 1.936 |
| TRIDC5BG0<br>10450 | 18.4.1.25   | Protein<br>modification/phosphorylation<br>/TKL protein kinase<br>superfamily/protein kinase<br>(WAK/WAKL)                                                               | protein kinase (WAK/WAKL)<br>(original description: none)                                                                                                                                                                                                                                                   | 6.407 |
| TRIDC5BG0<br>10470 | 18.4.1.25   | Protein<br>modification/phosphorylation<br>/TKL protein kinase<br>superfamily/protein kinase<br>(WAK/WAKL)                                                               | protein kinase (WAK/WAKL)<br>(original description: none)                                                                                                                                                                                                                                                   | 7.548 |
| TRIDC3AG0<br>40710 | 18.4.1.30   | Protein<br>modification/phosphorylation<br>/TKL protein kinase<br>superfamily/protein kinase<br>(MAP3K-RAF)                                                              | protein kinase (MAP3K-RAF)<br>(original description: none)                                                                                                                                                                                                                                                  | 3.977 |
| TRIDC5BG0<br>01040 | 18.4.1.46   | Protein<br>modification/phosphorylation<br>/TKL protein kinase<br>superfamily/protein kinase<br>(DLSV)                                                                   | protein kinase (DLSV) (original<br>description: none)                                                                                                                                                                                                                                                       | 6.467 |
| TRIDC3BG0<br>13490 | 18.4.24.1.1 | Protein<br>modification/phosphorylation<br>/serine/threonine protein<br>phosphatase superfamily/PPP<br>Fe-Zn-dependent<br>phosphatase families/PP1-<br>class phosphatase | PP1 phosphatase (original<br>description: none)                                                                                                                                                                                                                                                             | 2.935 |

|                    |             |                                                                                                                                                                               |                                                                                                                                                     |        |
|--------------------|-------------|-------------------------------------------------------------------------------------------------------------------------------------------------------------------------------|-----------------------------------------------------------------------------------------------------------------------------------------------------|--------|
| TRIDC5AG0<br>37820 | 18.4.24.2.8 | Protein<br>modification/phosphorylation<br>/serine/threonine protein<br>phosphatase<br>superfamily/PPM/PP2C<br>Mn/Mg-dependent<br>phosphatase families/clade H<br>phosphatase | clade H phosphatase (original<br>description: none)                                                                                                 | 6.885  |
| TRIDC4AG0<br>19030 | 18.4.5.3    | Protein<br>modification/phosphorylation<br>/CAMK protein kinase<br>superfamily/SNF1-related<br>protein kinase (SnRK3)                                                         | SNF1-related protein kinase<br>(SnRK3) (original description:<br>none)                                                                              | 2.001  |
| TRIDC7BG0<br>32770 | 18.4.7.2    | Protein<br>modification/phosphorylation<br>/atypical protein kinase<br>families/protein kinase (RIO)                                                                          | RIO protein kinases (RIOKs) are<br>a relatively conserved family of<br>enzymes implicated in cell cycle<br>control and ribosomal RNA<br>processing. | 1.738  |
| TRIDC2BG0<br>32750 | 18.8.1.4    | Protein modification/S-<br>glutathionylation/glutathione<br>S-transferase activities/class<br>tau glutathione S-transferase                                                   | class tau glutathione S-<br>transferase (original description:<br>none)                                                                             | 1.513  |
| TRIDC2BG0<br>59360 | 19.4.2.1.2  | Protein<br>homeostasis/proteolysis/serin<br>e-type peptidase<br>activities/S8-class protease<br>(subtilisin) families/protease<br>(SBT2)                                      | protease (SBT2) (original<br>description: none)                                                                                                     | 20.112 |
| TRIDC5BG0<br>79600 | 19.4.3.1    | Protein<br>homeostasis/proteolysis/aspar<br>tic-type peptidase<br>activities/A1-class protease<br>(Pepsin)                                                                    | pepsin-type protease (original<br>description: none)                                                                                                | 6.364  |
| TRIDC5BG0<br>06190 | 20.1.3.10   | Cytoskeleton<br>organization/microtubular<br>network/Kinesin<br>microtubule-based motor<br>protein activities/motor<br>protein (Kinesin-12)                                   | motor protein (Kinesin-12)<br>(original description: none)                                                                                          | -1.397 |

|                    |                  |                                                                                                                                                            |                                                                                              |        |
|--------------------|------------------|------------------------------------------------------------------------------------------------------------------------------------------------------------|----------------------------------------------------------------------------------------------|--------|
| TRIDC2AG0<br>57350 | 20.1.5.1.3       | Cytoskeleton<br>organization/microtubular<br>network/microtubule<br>dynamics/microtubule (MT)<br>plus-end-tracking/MT plus-<br>end-tracking protein (SPR1) | MT plus-end-tracking protein<br>(SPR1) (original description:<br>none)                       | 2.410  |
| TRIDC2BG0<br>10910 | 21.2.2.1.3.<br>1 | Cell wall<br>organization/hemicellulose/x<br>ylan/biosynthesis/xylosyltran<br>sferase<br>activities/xylosyltransferase<br>(IRX9)                           | xylosyltransferase (IRX9)<br>(original description: none)                                    | -3.653 |
| TRIDC2BG0<br>31640 | 21.2.4.1         | Cell wall<br>organization/hemicellulose/m<br>ixed-linked glucan/D-glucan<br>synthase (CSLF)                                                                | D-glucan synthase (CSLF)<br>(original description: none)                                     | -1.489 |
| TRIDC2BG0<br>42360 | 21.8.1.2         | Cell wall<br>organization/sporopollenin/bi<br>osynthesis/acyl-CoA<br>synthetase (ACS5)                                                                     | acyl-CoA synthetase (ACS5)<br>(original description: none)                                   | 20.670 |
| TRIDC6BG0<br>21650 | 22.6.3.1         | Vesicle trafficking/target<br>membrane tethering/Exocyst<br>complex/component EXO70                                                                        | Exo70 is a direct substrate of the<br>extracellular signal-regulated<br>kinases 1/2 (ERK1/2) | -1.426 |
| TRIDC2BG0<br>87400 | 22.6.3.1         | Vesicle trafficking/target<br>membrane tethering/Exocyst<br>complex/component EXO70                                                                        | component EXO70 of Exocyst<br>complex (original description:<br>none)                        | 1.575  |
| TRIDC5AG0<br>68850 | 24.2.1.5         | Solute transport/carrier-<br>mediated transport/DMT<br>superfamily/solute<br>transporter (UmamiT)                                                          | solute transporter (UmamiT)<br>(original description: none)                                  | -2.528 |
| TRIDC1BG0<br>43540 | 24.2.1.5         | Solute transport/carrier-<br>mediated transport/DMT<br>superfamily/solute<br>transporter (UmamiT)                                                          | solute transporter (UmamiT)<br>(original description: none)                                  | 1.722  |
| TRIDC2AG0<br>55510 | 24.2.2.1.3       | Solute transport/carrier-<br>mediated transport/MFS<br>superfamily/SP<br>family/inositol transporter<br>(INT)                                              | inositol transporter (INT)<br>(original description: none)                                   | 4.746  |
| TRIDC5AG0<br>29700 | 24.2.2.1.6       | Solute transport/carrier-<br>mediated transport/MFS<br>superfamily/SP<br>family/monosaccharide<br>transporter (STP)                                        | monosaccharide transporter<br>(STP) (original description:<br>none)                          | 1.410  |



|                    |            |                                                                                                                                                |                                                                     |        |
|--------------------|------------|------------------------------------------------------------------------------------------------------------------------------------------------|---------------------------------------------------------------------|--------|
| TRIDC6AG0<br>03780 | 24.2.2.10  | Solute transport/carrier-mediated transport/MFS superfamily/nitrate transporter (NRT2)                                                         | nitrate transporter (NRT2)<br>(original description: none)          | 3.582  |
| TRIDC1AG0<br>40150 | 24.2.2.9   | Solute transport/carrier-mediated transport/MFS superfamily/anion transporter (NRT1/PTR)                                                       | anion transporter (NRT1/PTR)<br>(original description: none)        | 1.668  |
| TRIDC4BG0<br>56890 | 24.2.2.9   | Solute transport/carrier-mediated transport/MFS superfamily/anion transporter (NRT1/PTR)                                                       | anion transporter (NRT1/PTR)<br>(original description: none)        | 1.754  |
| TRIDC2AG0<br>80650 | 24.2.2.9   | Solute transport/carrier-mediated transport/MFS superfamily/anion transporter (NRT1/PTR)                                                       | anion transporter (NRT1/PTR)<br>(original description: none)        | 3.516  |
| TRIDC7BG0<br>58370 | 24.2.3.5.1 | Solute transport/carrier-mediated transport/APC superfamily/APC family/amino acid transporter (LAT)                                            | Peroxidase 3 OS=Arabidopsis thaliana (sp o23044 per3_arath : 380.0) | 1.733  |
| TRIDC7BG0<br>21730 | 24.2.4.1.1 | Solute transport/carrier-mediated transport/MOP superfamily/MATE family/metabolite transporter (DTX)                                           | DTX/MATE-type Transporter Facilitates Absciscic Acid Efflux         | -1.312 |
| TRIDC6AG0<br>56910 | 24.2.6.1   | Solute transport/carrier-mediated transport/TOC superfamily/sugar efflux transporter (SWEET)                                                   | Peroxidase 2 OS=Zea mays (sp q9feq8 per2_maize : 211.0)             | 1.522  |
| TRIDC2AG0<br>36110 | 24.3.9     | Solute transport/channels/ligand-gated cation channel (GLR)                                                                                    | ligand-gated cation channel (GLR) (original description: none)      | 1.406  |
| TRIDC5BG0<br>36930 | 24.3.9     | Solute transport/channels/ligand-gated cation channel (GLR)                                                                                    | ligand-gated cation channel (GLR) (original description: none)      | 1.918  |
| TRIDC1BG0<br>44360 | 26.6.1.1.1 | External stimuli response/salinity/SOS (Salt Overly Sensitive) signalling pathway/SOS3-SOS2 signalling/calcium-dependent SOS2 activator (SOS3) | calcium-dependent SOS2 activator SOS3 (original description: none)  | -2.432 |

|                    |        |                                                                                                              |                                                                                                                                          |        |
|--------------------|--------|--------------------------------------------------------------------------------------------------------------|------------------------------------------------------------------------------------------------------------------------------------------|--------|
| TRIDC5BG0<br>51120 | 27.1.4 | Multi-process<br>regulation/circadian clock<br>system/time-of-day-<br>dependent expressed<br>repressor (PRR) | PRR circadian clock time-of-<br>day-dependent expressed<br>repressor (original description:<br>none)                                     | 2.157  |
| TRIDC7AG0<br>13410 | 27.8.1 | Multi-process regulation/PEB<br>protein-dependent<br>signalling/regulatory protein<br>(PEBP)                 | protein kinase (SD-1) (original<br>description: none)                                                                                    | 7.519  |
| TRIDC4AG0<br>65770 | 35.1   | not assigned/annotated                                                                                       | Disease resistance protein RPM1<br>OS=Arabidopsis thaliana<br>(sp q39214 rpm1_arath : 400.0)                                             | -5.008 |
| TRIDC7BG0<br>10170 | 35.1   | not assigned/annotated                                                                                       | transcription factor<br>(MADS/AGL) (original<br>description: none)                                                                       | -3.475 |
| TRIDC6BG0<br>12240 | 35.1   | not assigned/annotated                                                                                       | Probable LRR receptor-like<br>serine/threonine-protein kinase<br>At3g47570 OS=Arabidopsis<br>thaliana (sp c0lgp4 y3475_arath :<br>238.0) | -2.280 |
| TRIDC6AG0<br>11890 | 35.1   | not assigned/annotated                                                                                       | Pentatricopeptide repeat-<br>containing protein At4g02750<br>OS=Arabidopsis thaliana<br>(sp q9sy02 pp301_arath : 444.0)                  | -2.103 |
| TRIDC2BG0<br>04420 | 35.1   | not assigned/annotated                                                                                       | Chalcone synthase 2 OS=Secale<br>cereale (sp p53415 chs2_secce :<br>132.0)                                                               | -2.060 |
| TRIDC7AG0<br>72970 | 35.1   | not assigned/annotated                                                                                       | Ubiquitin-40S ribosomal protein<br>S27a-3 OS=Arabidopsis thaliana<br>(sp p59233 r27ac_arath : 142.0)                                     | -2.033 |
| TRIDC4BG0<br>05240 | 35.1   | not assigned/annotated                                                                                       | Uncharacterized protein<br>At4g38062 OS=Arabidopsis<br>thaliana (sp p0cb23 y4862_arath<br>: 192.0)                                       | -1.921 |

|                    |      |                        |                                                                                                                                                                                                                  |        |
|--------------------|------|------------------------|------------------------------------------------------------------------------------------------------------------------------------------------------------------------------------------------------------------|--------|
| TRIDC7AG0<br>20140 | 35.1 | not assigned/annotated | Probable apyrase 3 OS=Oryza sativa subsp. japonica (sp q2qye1 apy3_orysj : 591.0) & Enzyme classification.EC_3 hydrolases.EC_3.6 hydrolase acting on acid anhydride(50.3.6 : 113.0) (original description: none) | -1.908 |
| TRIDC6BG0<br>54630 | 35.1 | not assigned/annotated | Probable RNA-dependent RNA polymerase 1 OS=Oryza sativa subsp. japonica (sp q0dxs3 rdr1_orysj : 1255.0)                                                                                                          | -1.789 |
| TRIDC1AG0<br>39360 | 35.1 | not assigned/annotated | Zinc finger CCCH domain-containing protein 44 OS=Arabidopsis thaliana (sp q9sd34 c3h44_arath : 216.0)                                                                                                            | -1.776 |
| TRIDC6BG0<br>17260 | 35.1 | not assigned/annotated | S-(+)-linalool synthase, chloroplastic OS=Oryza sativa subsp. japonica (sp q6zh94 lins_orysj : 114.0) & Enzyme classification.EC_4 lyases.EC_4.2 carbon-oxygen lyase(50.4.2 : 32.8) (original description: none) | -1.757 |
| TRIDC7BG0<br>64160 | 35.1 | not assigned/annotated | Probable E3 ubiquitin-protein ligase LOG2 OS=Arabidopsis thaliana (sp q9s752 lofg2_arath : 250.0)                                                                                                                | -1.581 |
| TRIDC7AG0<br>06240 | 35.1 | not assigned/annotated | 7-deoxyloganetin glucosyltransferase OS=Gardenia jasminoides (sp f8wkw1 ugt2_garja : 579.0) & Enzyme classification.EC_2 transferases.EC_2.4 glycosyltransferase(50.2.4 : 232.2) (original description: none)    | -1.541 |

|                    |      |                        |                                                                                                                                                                                                                                               |        |
|--------------------|------|------------------------|-----------------------------------------------------------------------------------------------------------------------------------------------------------------------------------------------------------------------------------------------|--------|
| TRIDC7AG0<br>75460 | 35.1 | not assigned/annotated | Probable O-methyltransferase 2<br>OS=Sorghum bicolor<br>(sp a8qw51 omt2_sorbi : 471.0)<br>& Enzyme classification.EC_2<br>transferases.EC_2.1 transferase<br>transferring one-carbon<br>group(50.2.1 : 124.1) (original<br>description: none) | -1.511 |
| TRIDC7BG0<br>56330 | 35.1 | not assigned/annotated | histone (H2A) (original<br>description: none)                                                                                                                                                                                                 | -1.507 |
| TRIDC7BG0<br>26890 | 35.1 | not assigned/annotated | metabolite transporter (DTX)<br>(original description: none)                                                                                                                                                                                  | -1.503 |
| TRIDC3BG0<br>24680 | 35.1 | not assigned/annotated | Glycerol-3-phosphate<br>acyltransferase 1<br>OS=Arabidopsis thaliana<br>(sp q9shj5 gpat1_arath : 214.0)                                                                                                                                       | -1.481 |
| TRIDC7BG0<br>68600 | 35.1 | not assigned/annotated | Probable histidine kinase 1<br>OS=Oryza sativa subsp. indica<br>(sp a2yfr6 ohk1_orysi : 1377.0)                                                                                                                                               | -1.402 |
| TRIDC1BG0<br>21020 | 35.1 | not assigned/annotated | MAR-binding filament-like<br>protein 1-1 OS=Nicotiana<br>tabacum (sp q9m7j4 mfp1_tobac<br>: 201.0)                                                                                                                                            | -1.351 |
| TRIDC7BG0<br>32720 | 35.1 | not assigned/annotated | Thaumatococcus-like protein 1<br>OS=Arabidopsis thaliana<br>(sp a0a1p8b554 thlp1_arath :<br>134.0)                                                                                                                                            | -1.347 |
| TRIDC4AG0<br>12300 | 35.1 | not assigned/annotated | Alpha-dioxygenase 1<br>OS=Arabidopsis thaliana<br>(sp q9sgh6 dox1_arath : 276.0)                                                                                                                                                              | -1.339 |
| TRIDC2AG0<br>66940 | 35.1 | not assigned/annotated | Putative disease resistance<br>protein RGA3 OS=Solanum<br>bulbocastanum<br>(sp q7xa40 rga3_solbu : 265.0)                                                                                                                                     | -1.322 |
| TRIDC7BG0<br>60470 | 35.1 | not assigned/annotated | amino acid transporter (LAT)<br>(original description: none)                                                                                                                                                                                  | -1.322 |

|                    |      |                        |                                                                                                                                          |        |
|--------------------|------|------------------------|------------------------------------------------------------------------------------------------------------------------------------------|--------|
| TRIDC4BG0<br>40200 | 35.1 | not assigned/annotated | Small GTPase LIP1<br>OS=Arabidopsis thaliana<br>(sp q9c5j9 liip1_arath : 211.0)                                                          | -1.300 |
| TRIDC1BG0<br>40170 | 35.1 | not assigned/annotated | Probable LRR receptor-like<br>serine/threonine-protein kinase<br>At3g47570 OS=Arabidopsis<br>thaliana (sp c0lgp4 y3475_arath :<br>175.0) | 1.321  |
| TRIDC6BG0<br>67850 | 35.1 | not assigned/annotated | GDSL esterase/lipase At1g71691<br>OS=Arabidopsis thaliana<br>(sp q9sf78 gdl29_arath : 166.0)                                             | 1.332  |
| TRIDC1BG0<br>32670 | 35.1 | not assigned/annotated | Glutathione S-transferase U18<br>OS=Arabidopsis thaliana<br>(sp q9fus9 gstui_arath : 111.0)                                              | 1.338  |
| TRIDC2AG0<br>13320 | 35.1 | not assigned/annotated | Putative disease resistance<br>RPP13-like protein 1<br>OS=Arabidopsis thaliana<br>(sp q9lrr4 r1311_arath : 232.0)                        | 1.350  |
| TRIDC6AG0<br>39210 | 35.1 | not assigned/annotated | protein kinase (LRR-XII)<br>(original description: none)                                                                                 | 1.399  |
| TRIDC6AG0<br>58030 | 35.1 | not assigned/annotated | sugar efflux transporter<br>(SWEET) (original description:<br>none)                                                                      | 1.407  |
| TRIDC2BG0<br>46370 | 35.1 | not assigned/annotated | Protein SET DOMAIN GROUP<br>41 OS=Arabidopsis thaliana<br>(sp q3ecy6 sdg41_arath : 247.0)                                                | 1.414  |
| TRIDC5AG0<br>46840 | 35.1 | not assigned/annotated | Rhodanese-like domain-<br>containing protein 14,<br>chloroplastic OS=Arabidopsis<br>thaliana (sp q94a65 str14_arath :<br>258.0)          | 1.436  |
| TRIDC1AG0<br>37370 | 35.1 | not assigned/annotated | CASP-like protein 1D1<br>OS=Oryza sativa subsp. japonica<br>(sp q6yt98 csp17_orysj : 95.9)                                               | 1.443  |

|                    |      |                        |                                                                                                                        |       |
|--------------------|------|------------------------|------------------------------------------------------------------------------------------------------------------------|-------|
| TRIDC4BG0<br>08640 | 35.1 | not assigned/annotated | Phenolic glucoside<br>malonyltransferase 2<br>OS=Arabidopsis thaliana<br>(sp q9lrq8 pmat2_arath : 119.0)               | 1.470 |
| TRIDC3AG0<br>55380 | 35.1 | not assigned/annotated | Receptor protein-tyrosine kinase<br>CEPR2 OS=Arabidopsis thaliana<br>(sp q9c7t7 cepr2_arath : 589.0)                   | 1.477 |
| TRIDC2AG0<br>43690 | 35.1 | not assigned/annotated | Protein SET DOMAIN GROUP<br>41 OS=Arabidopsis thaliana<br>(sp q3ecy6 sdg41_arath : 80.9)                               | 1.477 |
| TRIDC2AG0<br>41570 | 35.1 | not assigned/annotated | Heavy metal-associated<br>isoprenylated plant protein 22<br>OS=Arabidopsis thaliana<br>(sp q93vp2 hip22_arath : 171.0) | 1.491 |
| TRIDC3AG0<br>06590 | 35.1 | not assigned/annotated | GDSL esterase/lipase At2g27360<br>OS=Arabidopsis thaliana<br>(sp q9zqi3 gdl40_arath : 184.0)                           | 1.513 |
| TRIDC1BG0<br>25800 | 35.1 | not assigned/annotated | E3 ubiquitin-protein ligase<br>RZFP34 OS=Arabidopsis<br>thaliana (sp q9ffb6 zfp34_arath :<br>158.0)                    | 1.522 |
| TRIDC1BG0<br>07600 | 35.1 | not assigned/annotated | Protein trichome birefringence-<br>like 11 OS=Arabidopsis thaliana<br>(sp q5bpj0 tbl11_arath : 260.0)                  | 1.529 |
| TRIDC5AG0<br>14710 | 35.1 | not assigned/annotated | L-gulonolactone oxidase 2<br>OS=Arabidopsis thaliana<br>(sp q6nq66 gglo2_arath : 562.0)                                | 1.541 |
| TRIDC5AG0<br>05640 | 35.1 | not assigned/annotated | Putative disease resistance<br>protein RGA3 OS=Solanum<br>bulbocastanum<br>(sp q7xa40 rga3_solbu : 248.0)              | 1.618 |

|                    |      |                        |                                                                                                                       |       |
|--------------------|------|------------------------|-----------------------------------------------------------------------------------------------------------------------|-------|
| TRIDC6AG0<br>10840 | 35.1 | not assigned/annotated | signal peptidase (SPP) (original<br>description: none)                                                                | 1.644 |
| TRIDC6BG0<br>43940 | 35.1 | not assigned/annotated | Probable WRKY transcription<br>factor 19 OS=Arabidopsis<br>thaliana (sp q9sz67 wrk19_arath<br>: 255.0)                | 1.715 |
| TRIDC3AG0<br>22790 | 35.1 | not assigned/annotated | Pathogen-related protein<br>OS=Hordeum vulgare<br>(sp p16273 prpx_horvu : 345.0)                                      | 1.785 |
| TRIDC2BG0<br>82330 | 35.1 | not assigned/annotated | Heavy metal-associated<br>isoprenylated plant protein 39<br>OS=Arabidopsis thaliana<br>(sp o03982 hip39_arath : 83.2) | 1.877 |
| TRIDC4AG0<br>38540 | 35.1 | not assigned/annotated | Dormancy-associated protein 1<br>OS=Pisum sativum<br>(sp o22611 drm1_pea : 92.8)                                      | 2.006 |
| TRIDC2BG0<br>15880 | 35.1 | not assigned/annotated | Peroxidase 2 OS=Oryza sativa<br>subsp. indica<br>(sp a2ypx3 per2_orysi : 358.0)                                       | 2.039 |
| TRIDC3BG0<br>60650 | 35.1 | not assigned/annotated | UDP-glycosyltransferase 91A1<br>OS=Arabidopsis thaliana<br>(sp q940v3 u91a1_arath : 80.1)                             | 2.259 |
| TRIDC6BG0<br>48590 | 35.1 | not assigned/annotated | transcription factor<br>(MADS/AGL) (original<br>description: none)                                                    | 2.270 |
| TRIDC4BG0<br>60190 | 35.1 | not assigned/annotated | L-gulonolactone oxidase 2<br>OS=Arabidopsis thaliana<br>(sp q6nq66 gglo2_arath : 533.0)                               | 2.584 |
| TRIDC7AG0<br>37590 | 35.1 | not assigned/annotated | 65-kDa microtubule-associated<br>protein 8 OS=Arabidopsis<br>thaliana (sp q9c7g0 ma658_arath<br>: 397.0)              | 2.658 |

|                    |      |                        |                                                                                                                                                                                                                                                                                                                |       |
|--------------------|------|------------------------|----------------------------------------------------------------------------------------------------------------------------------------------------------------------------------------------------------------------------------------------------------------------------------------------------------------|-------|
| TRIDC2AG0<br>77130 | 35.1 | not assigned/annotated | Chaperone protein dnaJ C76,<br>chloroplastic OS=Arabidopsis<br>thaliana (sp q9fmx6 djC76_arath :<br>271.0)                                                                                                                                                                                                     | 2.826 |
| TRIDC4AG0<br>08190 | 35.1 | not assigned/annotated | MADS-box transcription factor 1<br>OS=Oryza sativa subsp. indica<br>(sp a2xdy1 mads1_orysi : 186.0)                                                                                                                                                                                                            | 2.884 |
| TRIDC7BG0<br>19110 | 35.1 | not assigned/annotated | Pathogenesis-related protein 1<br>OS=Asparagus officinalis<br>(sp q05736 pr1_aspof : 91.3)                                                                                                                                                                                                                     | 3.286 |
| TRIDC2BG0<br>51790 | 35.1 | not assigned/annotated | Probable aldo-keto reductase 2<br>OS=Oryza sativa subsp. indica<br>(sp a2xrz0 akr2_orysi : 139.0)                                                                                                                                                                                                              | 3.467 |
| TRIDC7BG0<br>36280 | 35.1 | not assigned/annotated | transcription factor<br>(MADS/AGL) (original<br>description: none)                                                                                                                                                                                                                                             | 3.536 |
| TRIDC5AG0<br>20540 | 35.1 | not assigned/annotated | Beta-galactosidase 4 OS=Oryza<br>sativa subsp. japonica<br>(sp q6z6k4 bgal4_orysj : 84.7)                                                                                                                                                                                                                      | 3.690 |
| TRIDC7AG0<br>62880 | 35.1 | not assigned/annotated | G-type lectin S-receptor-like<br>serine/threonine-protein kinase<br>At2g19130 OS=Arabidopsis<br>thaliana (sp o64477 y2913_arath<br>: 587.0) & Enzyme<br>classification.EC_2<br>transferases.EC_2.7 transferase<br>transferring phosphorus-<br>containing group(50.2.7 : 100.4)<br>(original description: none) | 3.786 |
| TRIDC6BG0<br>52920 | 35.1 | not assigned/annotated | 9-cis-epoxycarotenoid<br>dioxygenase NCED1,<br>chloroplastic OS=Oryza sativa<br>subsp. japonica<br>(sp q6yvjo nced1_orysj : 202.0)                                                                                                                                                                             | 3.946 |



|                    |      |                        |                                                                                                                                                                                                                                                                                                                                                     |       |
|--------------------|------|------------------------|-----------------------------------------------------------------------------------------------------------------------------------------------------------------------------------------------------------------------------------------------------------------------------------------------------------------------------------------------------|-------|
| TRIDC6BG0<br>11930 | 35.1 | not assigned/annotated | Peroxidase 70 OS=Zea mays<br>(sp a5h452 per70_maize : 367.0)                                                                                                                                                                                                                                                                                        | 4.093 |
| TRIDC5AG0<br>47410 | 35.1 | not assigned/annotated | Two-component response<br>regulator-like PRR95 OS=Oryza<br>sativa subsp. japonica<br>(sp q689g6 pr95_orysj : 374.0)                                                                                                                                                                                                                                 | 4.352 |
| TRIDC6BG0<br>73190 | 35.1 | not assigned/annotated | Putative disease resistance<br>protein RGA4 OS=Solanum<br>bulbocastanum<br>(sp q7xa39 rga4_solbu : 201.0)                                                                                                                                                                                                                                           | 4.942 |
| TRIDC7BG0<br>02180 | 35.1 | not assigned/annotated | Coatomer subunit beta                                                                                                                                                                                                                                                                                                                               | 4.966 |
| TRIDC1BG0<br>42910 | 35.1 | not assigned/annotated | Putative disease resistance<br>protein RGA1 OS=Solanum<br>bulbocastanum<br>(sp q7xa42 rga1_solbu : 137.0)                                                                                                                                                                                                                                           | 5.678 |
| TRIDC2BG0<br>29870 | 35.1 | not assigned/annotated | Fatty-acid-binding protein 1<br>OS=Arabidopsis thaliana<br>(sp q9m1x2 fap1_arath : 155.0)                                                                                                                                                                                                                                                           | 6.126 |
| TRIDC7AG0<br>21890 | 35.1 | not assigned/annotated | RbcX assembly factor involved<br>in RuBisCo assembly (original<br>description: none)                                                                                                                                                                                                                                                                | 6.328 |
| TRIDC6AG0<br>42450 | 35.1 | not assigned/annotated | 9-cis-epoxycarotenoid<br>dioxygenase NCED1,<br>chloroplastic OS=Oryza sativa<br>subsp. japonica<br>(sp q6yvj0 nced1_orysj : 531.0)<br>& Enzyme classification.EC_1<br>oxidoreductases.EC_1.13<br>oxidoreductase acting on single<br>donor with incorporation of<br>molecular oxygen<br>(oxygenase)(50.1.12 : 266.4)<br>(original description: none) | 6.454 |

|                    |      |                        |                                                                                                                                                                                                                                                                         |       |
|--------------------|------|------------------------|-------------------------------------------------------------------------------------------------------------------------------------------------------------------------------------------------------------------------------------------------------------------------|-------|
| TRIDC7AG0<br>16880 | 35.1 | not assigned/annotated | PEB protein-dependent signalling regulatory protein (PEBP) (original description: none)                                                                                                                                                                                 | 6.708 |
| TRIDC6AG0<br>21100 | 35.1 | not assigned/annotated | NAC transcription factor NAM-A1 OS=Triticum turgidum subsp. durum (sp a0spj3 nama1_tritd : 327.0)                                                                                                                                                                       | 6.762 |
| TRIDC6BG0<br>26600 | 35.1 | not assigned/annotated | Enzyme classification.EC_1 oxidoreductases.EC_1.14 oxidoreductase acting on paired donor with incorporation or reduction of molecular oxygen(50.1.13 : 224.7) & Cytochrome P450 CYP71D313 OS=Panax ginseng (sp h2dh20 c7d13_pangi : 207.0) (original description: none) | 6.773 |
| TRIDC3BG0<br>39900 | 35.1 | not assigned/annotated | Probable protein phosphatase 2C 8 OS=Oryza sativa subsp. japonica (sp q5sn75 p2c08_orysj : 162.0)                                                                                                                                                                       | 6.957 |
| TRIDC2BG0<br>80020 | 35.1 | not assigned/annotated | BTB/POZ and MATH domain-containing protein 1 OS=Arabidopsis thaliana (sp q8l765 bpm1_arath : 228.0)                                                                                                                                                                     | 7.458 |
| TRIDC6BG0<br>72880 | 35.1 | not assigned/annotated | A-type cytokinin ARR response negative regulator (original description: none)                                                                                                                                                                                           | 7.903 |

|                    |         |                                                                                                                                                             |                                                                                                                                                                                                                                                                                                                                      |        |
|--------------------|---------|-------------------------------------------------------------------------------------------------------------------------------------------------------------|--------------------------------------------------------------------------------------------------------------------------------------------------------------------------------------------------------------------------------------------------------------------------------------------------------------------------------------|--------|
| TRIDC2BG0<br>00740 | 50.1.13 | Enzyme classification/EC_1<br>oxidoreductases/EC_1/14<br>oxidoreductase acting on<br>paired donor with<br>incorporation or reduction of<br>molecular oxygen | Ent-cassadiene C2-hydroxylase<br>OS= <i>Oryza sativa</i> subsp. <i>japonica</i><br>(sp q6yv88 c71z7_orysj : 392.0)<br>& Enzyme classification.EC_1<br>oxidoreductases.EC_1.14<br>oxidoreductase acting on paired<br>donor with incorporation or<br>reduction of molecular<br>oxygen(50.1.13 : 308.5) (original<br>description: none) | -1.798 |
| TRIDC5AG0<br>01540 | 50.1.13 | Enzyme classification/EC_1<br>oxidoreductases/EC_1/14<br>oxidoreductase acting on<br>paired donor with<br>incorporation or reduction of<br>molecular oxygen | 3-hydroxyindolin-2-one<br>monooxygenase OS= <i>Zea mays</i><br>(sp q43250 c71c1_maize : 821.0)<br>& Enzyme classification.EC_1<br>oxidoreductases.EC_1.14<br>oxidoreductase acting on paired<br>donor with incorporation or<br>reduction of molecular<br>oxygen(50.1.13 : 342.1) (original<br>description: none)                     | -1.328 |
| TRIDC4BG0<br>00670 | 50.1.13 | Enzyme classification/EC_1<br>oxidoreductases/EC_1/14<br>oxidoreductase acting on<br>paired donor with<br>incorporation or reduction of<br>molecular oxygen | Geraniol 8-hydroxylase<br>OS= <i>Swertia mussoitii</i><br>(sp d1mi46 c76ba_swemu :<br>413.0) & Enzyme<br>classification.EC_1<br>oxidoreductases.EC_1.14<br>oxidoreductase acting on paired<br>donor with incorporation or<br>reduction of molecular<br>oxygen(50.1.13 : 407.6) (original<br>description: none)                       | -1.307 |

|                    |         |                                                                                                                                                             |                                                                                                                                                                                                                                                                                                                                      |       |
|--------------------|---------|-------------------------------------------------------------------------------------------------------------------------------------------------------------|--------------------------------------------------------------------------------------------------------------------------------------------------------------------------------------------------------------------------------------------------------------------------------------------------------------------------------------|-------|
| TRIDC4BG0<br>00550 | 50.1.13 | Enzyme classification/EC_1<br>oxidoreductases/EC_1/14<br>oxidoreductase acting on<br>paired donor with<br>incorporation or reduction of<br>molecular oxygen | Noroxomaritidine synthase<br>OS=Narcissus aff.<br>pseudonarcissus MK-2014<br>(sp a0a140il90 c96t1_narap :<br>302.0) & Enzyme<br>classification.EC_1<br>oxidoreductases.EC_1.14<br>oxidoreductase acting on paired<br>donor with incorporation or<br>reduction of molecular<br>oxygen(50.1.13 : 94.3) (original<br>description: none) | 1.480 |
| TRIDC5AG0<br>07500 | 50.1.13 | Enzyme classification/EC_1<br>oxidoreductases/EC_1/14<br>oxidoreductase acting on<br>paired donor with<br>incorporation or reduction of<br>molecular oxygen | Flavanone 3-dioxygenase 2<br>OS=Oryza sativa subsp. japonica<br>(sp q8w2x5 fl3h2_orysj : 158.0)<br>& Enzyme classification.EC_1<br>oxidoreductases.EC_1.14<br>oxidoreductase acting on paired<br>donor with incorporation or<br>reduction of molecular<br>oxygen(50.1.13 : 106.5) (original<br>description: none)                    | 2.854 |
| TRIDC2AG0<br>08470 | 50.1.13 | Enzyme classification/EC_1<br>oxidoreductases/EC_1/14<br>oxidoreductase acting on<br>paired donor with<br>incorporation or reduction of<br>molecular oxygen | Cytochrome P450 99A2<br>OS=Oryza sativa subsp. japonica<br>(sp q7x7x4 c99a2_orysj : 303.0)<br>& Enzyme classification.EC_1<br>oxidoreductases.EC_1.14<br>oxidoreductase acting on paired<br>donor with incorporation or<br>reduction of molecular<br>oxygen(50.1.13 : 203.1) (original<br>description: none)                         | 3.316 |

|                    |         |                                                                                                                                                             |                                                                                                                                                                                                                                                                                                                 |       |
|--------------------|---------|-------------------------------------------------------------------------------------------------------------------------------------------------------------|-----------------------------------------------------------------------------------------------------------------------------------------------------------------------------------------------------------------------------------------------------------------------------------------------------------------|-------|
| TRIDC2AG0<br>65830 | 50.1.13 | Enzyme classification/EC_1<br>oxidoreductases/EC_1/14<br>oxidoreductase acting on<br>paired donor with<br>incorporation or reduction of<br>molecular oxygen | indolin-2-one monooxygenase<br>OS=Zea mays<br>(sp q43255 c71c2_maize : 481.0)<br>& Enzyme classification.EC_1<br>oxidoreductases.EC_1.14<br>oxidoreductase acting on paired<br>donor with incorporation or<br>reduction of molecular<br>oxygen(50.1.13 : 352.1) (original<br>description: none)                 | 3.701 |
| TRIDC5BG0<br>08940 | 50.1.13 | Enzyme classification/EC_1<br>oxidoreductases/EC_1/14<br>oxidoreductase acting on<br>paired donor with<br>incorporation or reduction of<br>molecular oxygen | Protein DMR6-LIKE<br>OXYGENASE 1<br>OS=Arabidopsis thaliana<br>(sp q9zsa8 dlo1_arath : 194.0) &<br>Enzyme classification.EC_1<br>oxidoreductases.EC_1.14<br>oxidoreductase acting on paired<br>donor with incorporation or<br>reduction of molecular<br>oxygen(50.1.13 : 110.5) (original<br>description: none) | 3.858 |
| TRIDC6BG0<br>25800 | 50.1.13 | Enzyme classification/EC_1<br>oxidoreductases/EC_1/14<br>oxidoreductase acting on<br>paired donor with<br>incorporation or reduction of<br>molecular oxygen | protein kinase (L-lectin) (original<br>description: none)                                                                                                                                                                                                                                                       | 4.045 |
| TRIDC2BG0<br>10230 | 50.1.13 | Enzyme classification/EC_1<br>oxidoreductases/EC_1/14<br>oxidoreductase acting on<br>paired donor with<br>incorporation or reduction of<br>molecular oxygen | Cytochrome P450 99A2<br>OS=Oryza sativa subsp. japonica<br>(sp q7x7x4 c99a2_orysj : 296.0)<br>& Enzyme classification.EC_1<br>oxidoreductases.EC_1.14<br>oxidoreductase acting on paired<br>donor with incorporation or<br>reduction of molecular<br>oxygen(50.1.13 : 104.7) (original<br>description: none)    | 5.467 |

|                    |         |                                                                                                                                                             |                                                                                                                                                                                                                                                                                                                                       |        |
|--------------------|---------|-------------------------------------------------------------------------------------------------------------------------------------------------------------|---------------------------------------------------------------------------------------------------------------------------------------------------------------------------------------------------------------------------------------------------------------------------------------------------------------------------------------|--------|
| TRIDC2AG0<br>19170 | 50.1.13 | Enzyme classification/EC_1<br>oxidoreductases/EC_1/14<br>oxidoreductase acting on<br>paired donor with<br>incorporation or reduction of<br>molecular oxygen | Cytochrome P450 709B2<br>OS=Arabidopsis thaliana<br>(sp f4ik45 c70b2_arath : 314.0)<br>& Enzyme classification.EC_1<br>oxidoreductases.EC_1.14<br>oxidoreductase acting on paired<br>donor with incorporation or<br>reduction of molecular<br>oxygen(50.1.13 : 108.3) (original<br>description: none)                                 | 6.187  |
| TRIDC5BG0<br>26880 | 50.1.13 | Enzyme classification/EC_1<br>oxidoreductases/EC_1/14<br>oxidoreductase acting on<br>paired donor with<br>incorporation or reduction of<br>molecular oxygen | Probable 2-oxoglutarate-<br>dependent dioxygenase ANS<br>OS=Arabidopsis thaliana<br>(sp o80449 diox4_arath : 338.0)<br>& Enzyme classification.EC_1<br>oxidoreductases.EC_1.14<br>oxidoreductase acting on paired<br>donor with incorporation or<br>reduction of molecular<br>oxygen(50.1.13 : 140.6) (original<br>description: none) | 7.003  |
| TRIDC7AG0<br>75040 | 50.2.1  | Enzyme classification/EC_2<br>transferases/EC_2/1<br>transferase transferring one-<br>carbon group                                                          | BURP domain-containing<br>protein 11 OS=Oryza sativa<br>subsp. japonica<br>(sp q5z5c9 burpb_orysj : 129.0)                                                                                                                                                                                                                            | -1.482 |
| TRIDC2BG0<br>06380 | 50.2.1  | Enzyme classification/EC_2<br>transferases/EC_2/1<br>transferase transferring one-<br>carbon group                                                          | Enzyme classification.EC_2<br>transferases.EC_2.1 transferase<br>transferring one-carbon<br>group(50.2.1 : 330.0) & Tricetin<br>3                                                                                                                                                                                                     | -1.399 |
| TRIDC4BG0<br>08630 | 50.2.3  | Enzyme classification/EC_2<br>transferases/EC_2/3<br>acyltransferase                                                                                        | Phenolic glucoside<br>malonyltransferase 2<br>OS=Arabidopsis thaliana<br>(sp q9lrq8 pmat2_arath : 169.0)<br>& Enzyme classification.EC_2<br>transferases.EC_2.3<br>acyltransferase(50.2.3 : 27.6)<br>(original description: none)                                                                                                     | 2.179  |

|                    |        |                                                                                                              |                                                                                                                                                                                                                                                                                          |        |
|--------------------|--------|--------------------------------------------------------------------------------------------------------------|------------------------------------------------------------------------------------------------------------------------------------------------------------------------------------------------------------------------------------------------------------------------------------------|--------|
| TRIDC2BG0<br>89510 | 50.2.4 | Enzyme classification/EC_2<br>transferases/EC_2/4<br>glycosyltransferase                                     | UDP-glycosyltransferase 91D1<br>OS=Stevia rebaudiana<br>(sp q6vaa8 u91d1_stere : 133.0)<br>& Enzyme classification.EC_2<br>transferases.EC_2.4<br>glycosyltransferase(50.2.4 :<br>103.2) (original description:<br>none)                                                                 | 2.784  |
| TRIDC5BG0<br>26280 | 50.2.4 | Enzyme classification/EC_2<br>transferases/EC_2/4<br>glycosyltransferase                                     | UDP-glucosyltransferase<br>UGT13248 OS=Hordeum<br>vulgare subsp. vulgare<br>(sp m0y4p1 ugt13_horvv : 340.0)<br>& Enzyme classification.EC_2<br>transferases.EC_2.4<br>glycosyltransferase(50.2.4 :<br>326.5) (original description:<br>none)                                             | 3.572  |
| TRIDC2AG0<br>01630 | 50.2.7 | Enzyme classification/EC_2<br>transferases/EC_2/7<br>transferase transferring<br>phosphorus-containing group | L-type lectin-domain containing<br>receptor kinase IX.1<br>OS=Arabidopsis thaliana<br>(sp q9lxa5 lrk91_arath : 259.0) &<br>Enzyme classification.EC_2<br>transferases.EC_2.7 transferase<br>transferring phosphorus-<br>containing group(50.2.7 : 101.2)<br>(original description: none) | -1.397 |
| TRIDC6AG0<br>00240 | 50.2.7 | Enzyme classification/EC_2<br>transferases/EC_2/7<br>transferase transferring<br>phosphorus-containing group | Protein SUPPRESSOR OF<br>NPR1-1 CONSTITUTIVE 4<br>OS=Arabidopsis thaliana<br>(sp d7sfh9 lr126_arath : 371.0) &<br>Enzyme classification.EC_2<br>transferases.EC_2.7 transferase<br>transferring phosphorus-<br>containing group(50.2.7 : 125.5)<br>(original description: none)          | 1.610  |

|                    |        |                                                                                                              |                                                                                                                                                                                                                                                                            |        |
|--------------------|--------|--------------------------------------------------------------------------------------------------------------|----------------------------------------------------------------------------------------------------------------------------------------------------------------------------------------------------------------------------------------------------------------------------|--------|
| TRIDC6BG0<br>21850 | 50.2.7 | Enzyme classification/EC_2<br>transferases/EC_2/7<br>transferase transferring<br>phosphorus-containing group | component EXO70 of Exocyst<br>complex (original description:<br>none)                                                                                                                                                                                                      | 2.265  |
| TRIDC2AG0<br>80440 | 50.2.7 | Enzyme classification/EC_2<br>transferases/EC_2/7<br>transferase transferring<br>phosphorus-containing group | Receptor kinase-like protein<br>Xa21 OS=Oryza sativa subsp.<br>indica (sp q1mx30 xa21_orysi :<br>412.0) & Enzyme<br>classification.EC_2<br>transferases.EC_2.7 transferase<br>transferring phosphorus-<br>containing group(50.2.7 : 102.1)<br>(original description: none) | 7.432  |
| TRIDC7AG0<br>60170 | 50.2.7 | Enzyme classification/EC_2<br>transferases/EC_2/7<br>transferase transferring<br>phosphorus-containing group | Enzyme classification.EC_2<br>transferases.EC_2.8 transferase<br>transferring sulfur-containing<br>group(50.2.8 : 233.1) &<br>Cytosolic sulfotransferase 15<br>OS=Arabidopsis thaliana<br>(sp q8l5a7 sot15_arath : 169.0)<br>(original description: none)                  | 7.578  |
| TRIDC2BG0<br>34440 | 50.2.7 | Enzyme classification/EC_2<br>transferases/EC_2/7<br>transferase transferring<br>phosphorus-containing group | Enzyme classification.EC_2<br>transferases.EC_2.7 transferase<br>transferring phosphorus-<br>containing group(50.2.7 : 23.9)<br>(original description: none)                                                                                                               | 7.837  |
| TRIDC7AG0<br>59380 | 50.2.8 | Enzyme classification/EC_2<br>transferases/EC_2/8<br>transferase transferring<br>sulfur-containing group     | cytosolic polyamine oxidase<br>(PAO1) (original description:<br>none)                                                                                                                                                                                                      | -2.280 |



|                    |        |                                                                                                          |                                                                                                                                                                                                                                                                                                      |        |
|--------------------|--------|----------------------------------------------------------------------------------------------------------|------------------------------------------------------------------------------------------------------------------------------------------------------------------------------------------------------------------------------------------------------------------------------------------------------|--------|
| TRIDC1AG0<br>37530 | 50.2.8 | Enzyme classification/EC_2<br>transferases/EC_2/8<br>transferase transferring<br>sulfur-containing group | Enzyme classification.EC_2<br>transferases.EC_2.8 transferase<br>transferring sulfur-containing<br>group(50.2.8 : 211.0) &<br>Cytosolic sulfotransferase 1<br>OS=Arabidopsis thaliana<br>(sp q9fg94 sot1_arath : 149.0)<br>(original description: none)                                              | -1.782 |
| TRIDC5BG0<br>11000 | 50.3.1 | Enzyme classification/EC_3<br>hydrolases/EC_3/1 hydrolase<br>acting on ester bond                        | Fructose-1,6-bisphosphatase,<br>cytosolic OS=Saccharum hybrid<br>(sp q43139 fl6p2_sachy : 172.0)<br>& Enzyme classification.EC_3<br>hydrolases.EC_3.1 hydrolase<br>acting on ester bond(50.3.1 :<br>78.7) (original description: none)                                                               | 6.045  |
| TRIDC2AG0<br>78730 | 50.3.2 | Enzyme classification/EC_3<br>hydrolases/EC_3/2<br>glycosylase                                           | 4-hydroxy-7-methoxy-3-oxo-3,4-<br>dihydro-2H-1,4-benzoxazin-2-yl<br>glucoside beta-D-glucosidase 1d,<br>chloroplastic OS=Triticum<br>aestivum<br>(sp d5mtf8 hgl1d_wheat : 405.0)<br>& Enzyme classification.EC_3<br>hydrolases.EC_3.2<br>glycosylase(50.3.2 : 111.2)<br>(original description: none) | -1.360 |
| TRIDC1AG0<br>61460 | 50.3.2 | Enzyme classification/EC_3<br>hydrolases/EC_3/2<br>glycosylase                                           | Polygalacturonase At1g48100<br>OS=Arabidopsis thaliana<br>(sp q949z1 pglr4_arath : 112.0)<br>& Enzyme classification.EC_3<br>hydrolases.EC_3.2<br>glycosylase(50.3.2 : 64.6)<br>(original description: none)                                                                                         | 7.408  |

|                    |        |                                                                                       |                                                                                                                                          |       |
|--------------------|--------|---------------------------------------------------------------------------------------|------------------------------------------------------------------------------------------------------------------------------------------|-------|
| TRIDC7AG0<br>19910 | 50.3.6 | Enzyme classification/EC_3<br>hydrolases/EC_3/6 hydrolase<br>acting on acid anhydride | S-norcoclaurine synthase 1<br>OS=Coptis japonica<br>(sp a2a1a0 ncs1_copja : 103.0)                                                       | 1.833 |
| TRIDC6BG0<br>12300 | 50.4.2 | Enzyme classification/EC_4<br>lyases/EC_4/2 carbon-<br>oxygen lyase                   | Pentatricopeptide repeat-<br>containing protein At1g02060,<br>chloroplastic OS=Arabidopsis<br>thaliana (sp o81908 ppr2_arath :<br>401.0) | 6.570 |

Table S4. Gene ontology enrichment analysis by R package GOSep, significantly enriched ( $FDR \leq 0.05$ )

| Ontology | GO Term    | Description                                                                                                                   | Overrepresentation FDR | Overrepresentation (-Log FDR) | Genes in category | Total genes in the category |
|----------|------------|-------------------------------------------------------------------------------------------------------------------------------|------------------------|-------------------------------|-------------------|-----------------------------|
| MF       | GO:0020037 | heme binding                                                                                                                  | 8.13E-04               | 3.090                         | 8                 | 1407                        |
| CC       | GO:0010287 | plastoglobule                                                                                                                 | 9.70E-04               | 3.013                         | 2                 | 29                          |
| MF       | GO:0031956 | medium-chain fatty acid-CoA ligase activity                                                                                   | 2.97E-03               | 2.528                         | 1                 | 2                           |
| BP       | GO:0046949 | fatty-acyl-CoA biosynthetic process                                                                                           | 2.97E-03               | 2.528                         | 1                 | 2                           |
| MF       | GO:0008429 | phosphatidylethanolamine binding                                                                                              | 6.30E-03               | 2.201                         | 1                 | 4                           |
| MF       | GO:0004467 | long-chain fatty acid-CoA ligase activity                                                                                     | 6.55E-03               | 2.184                         | 1                 | 4                           |
| MF       | GO:0016702 | oxidoreductase activity, acting on single donors with incorporation of molecular oxygen, incorporation of two atoms of oxygen | 7.29E-03               | 2.137                         | 2                 | 77                          |
| BP       | GO:0042744 | hydrogen peroxide catabolic process                                                                                           | 7.37E-03               | 2.133                         | 3                 | 291                         |
| CC       | GO:0098807 | chloroplast thylakoid membrane protein complex                                                                                | 8.18E-03               | 2.087                         | 1                 | 6                           |
| BP       | GO:0055114 | oxidation-reduction process                                                                                                   | 9.52E-03               | 2.021                         | 11                | 3324                        |
| BP       | GO:0010229 | inflorescence development                                                                                                     | 1.22E-02               | 1.914                         | 1                 | 7                           |
| BP       | GO:0080110 | sporopollenin biosynthetic process                                                                                            | 1.41E-02               | 1.852                         | 1                 | 10                          |

|    |            |                                                                                                       |          |       |   |      |
|----|------------|-------------------------------------------------------------------------------------------------------|----------|-------|---|------|
| BP | GO:0048573 | photoperiodism, flowering                                                                             | 1.44E-02 | 1.842 | 1 | 10   |
| BP | GO:0071482 | cellular response to light stimulus                                                                   | 1.49E-02 | 1.828 | 1 | 10   |
| MF | GO:0016872 | intramolecular lyase activity                                                                         | 1.66E-02 | 1.780 | 1 | 12   |
| BP | GO:0000160 | phosphorelay signal transduction system                                                               | 1.72E-02 | 1.765 | 2 | 133  |
| MF | GO:0004601 | peroxidase activity                                                                                   | 2.18E-02 | 1.663 | 3 | 434  |
| CC | GO:0009507 | chloroplast                                                                                           | 2.19E-02 | 1.659 | 5 | 1012 |
| BP | GO:0048510 | regulation of timing of transition from vegetative to reproductive phase                              | 2.50E-02 | 1.602 | 1 | 16   |
| BP | GO:0006979 | response to oxidative stress                                                                          | 3.04E-02 | 1.518 | 3 | 493  |
| CC | GO:0009524 | phragmoplast                                                                                          | 3.09E-02 | 1.510 | 1 | 19   |
| MF | GO:0004834 | tryptophan synthase activity                                                                          | 3.17E-02 | 1.499 | 1 | 21   |
| MF | GO:0005504 | fatty acid binding                                                                                    | 3.54E-02 | 1.450 | 1 | 30   |
| CC | GO:0005819 | spindle                                                                                               | 3.64E-02 | 1.439 | 1 | 21   |
| MF | GO:0016705 | oxidoreductase activity, acting on paired donors, with incorporation or reduction of molecular oxygen | 3.95E-02 | 1.403 | 4 | 877  |
| BP | GO:0006568 | tryptophan metabolic process                                                                          | 4.12E-02 | 1.385 | 1 | 29   |
| CC | GO:0009941 | chloroplast envelope                                                                                  | 4.92E-02 | 1.308 | 2 | 228  |
